# Supplementary material for: Extraction-free protocol combining proteinase K and heat inactivation for detection of SARS-CoV-2 by RT-qPCR
Source: PubMed Central journal article supplement (PMC7909620; doi:10.1371/journal.pone.0247792), 2021-02-26
Supplement: pone.0247792.s001.pdf [file pone.0247792.s001.pdf]

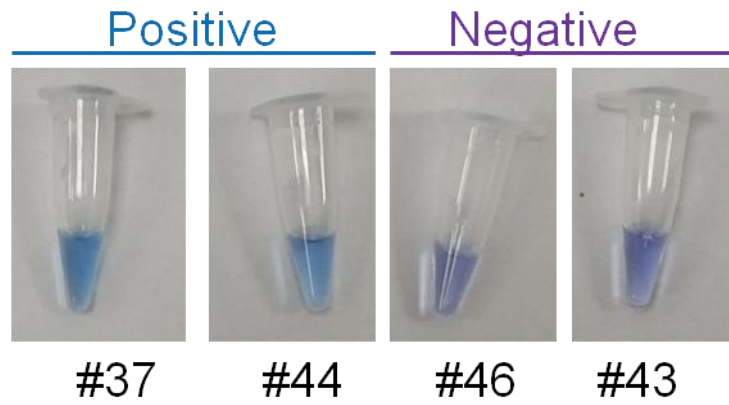

**S1 Fig. PK+HID can be combined with a detection kit based on LAMP reactions.** Representative colorimetric reactions run using COVID-19 Neokit Tecnoami, based on LAMP. Diagnostics is made according to final color of the solution: blue, positive; violet, negative.
