# Supplementary material for: Extraction-free protocol combining proteinase K and heat inactivation for detection of SARS-CoV-2 by RT-qPCR
Source: PubMed Central journal article supplement (PMC7909620; doi:10.1371/journal.pone.0247792), 2021-02-26
Supplement: pone.0247792.s007.pdf [file pone.0247792.s007.pdf]

| <b>Amplicon</b> | <b>CT<sub>PK+HID</sub> - CT<sub>RNA</sub></b> | <b>CT<sub>HID</sub> - CT<sub>RNA</sub></b> |
|-----------------|-----------------------------------------------|--------------------------------------------|
| N1              | 2.7 ± 0.6                                     | 5 ± 1                                      |
| N2              | 5.6 ± 0.4                                     | 9.5 ± 0.8                                  |
| RP              | 2.3 ± 0.5                                     | 5.5 ± 0.7                                  |

**S1 Table.** Mean variations in CT values in HID and PK+HID samples compared to purified RNA samples. Values are expressed as mean ± standard error.
