# Supplementary material for: Extraction-free protocol combining proteinase K and heat inactivation for detection of SARS-CoV-2 by RT-qPCR
Source: PubMed Central journal article supplement (PMC7909620; doi:10.1371/journal.pone.0247792), 2021-02-26
Supplement: pone.0247792.s008.pdf [file pone.0247792.s008.pdf]

| CT <sub>5μL</sub> (gene) | CT <sub>10μL</sub> (gene) |
|--------------------------|---------------------------|
| 40.4 (N1)<br>23.9 (RP)   | 34.0 (N1)<br>23.9 (RP)    |
| 22.8 (N1)<br>22.1(RP)    | 21.3 (N1)<br>21.4(RP)     |
| 22.6 (N1)<br>28.6 (RP)   | 21.9 (N1)<br>28.3 (RP)    |
| 24.8 (N1)<br>28.4 (RP)   | 24.6 (N1)<br>28.1 (RP)    |
| 26.1 (N1)<br>28.9 (RP)   | 25.0 (N1)<br>28.5 (RP)    |
| 31.2 (N1)<br>28.6 (RP)   | 30.9 (N1)<br>28.0(RP)     |
| 29.6 (N1)<br>30.0 (RP)   | 28.9 (N1)<br>29.5 (RP)    |
| 34.1 (N1)<br>29.5 (RP)   | 35.6 (N1)<br>29.0 (RP)    |

**S2 Table.** CT values obtained in RT-qPCR analysis of the same HID+PK samples introducing 5 or 10 μl of sample volume as input for RT-qPCR.
