# Supplementary material for: Extraction-free protocol combining proteinase K and heat inactivation for detection of SARS-CoV-2 by RT-qPCR
Source: PubMed Central journal article supplement (PMC7909620; doi:10.1371/journal.pone.0247792), 2021-02-26
Supplement: pone.0247792.s009.pdf [file pone.0247792.s009.pdf]

| <b>CT<sub>RNA</sub> (gene, kit)</b>                                                              | <b>CT<sub>PK+HID</sub> (gene, kit)</b>                                                       |
|--------------------------------------------------------------------------------------------------|----------------------------------------------------------------------------------------------|
| 30.7 (N, DisCoVery)<br>30.9 (ORF1ab, DisCoVery)<br>27.4 (RP, DisCoVery)                          | nd (N, DisCoVery)<br>nd (ORF1ab, DisCoVery)<br>23.2 (RP, DisCoVery)                          |
| 23.5 (N, DisCoVery)<br>21.1 (ORF1ab, DisCoVery)<br>26.2 (RP, DisCoVery)                          | nd (N, DisCoVery)<br>nd (ORF1ab, DisCoVery)<br>26.0 (RP, DisCoVery)                          |
| 31.3 (N, GeneFinder)<br>31.3 (RdRp, GeneFinder)<br>32.1 (E, GeneFinder)<br>27.3 (RP, Genefinder) | 40.1 (N, GeneFinder)<br>nd (RdRp, GeneFinder)<br>nd (E, GeneFinder)<br>30.3 (RP, Genefinder) |
| 34.6 (N, GeneFinder)<br>34.5 (RdRp, GeneFinder)<br>38.8 (E, GeneFinder)<br>27.2 (RP, Genefinder) | 41.3 (N, GeneFinder)<br>nd (RdRp, GeneFinder)<br>nd (E, GeneFinder)<br>28.2 (RP, Genefinder) |
| 35.9 (N, GeneFinder)<br>37.0 (RdRp, GeneFinder)<br>nd (E, GeneFinder)<br>28.4 (RP, Genefinder)   | nd (N, GeneFinder)<br>nd (RdRp, GeneFinder)<br>nd (E, GeneFinder)<br>30.6 (RP, Genefinder)   |

**S3 Table.** CT values of false-negative samples detected with the PK+HID method, using the results obtained with purified RNA samples as reference.
