# Supplementary material for: Extraction-free protocol combining proteinase K and heat inactivation for detection of SARS-CoV-2 by RT-qPCR
Source: PubMed Central journal article supplement (PMC7909620; doi:10.1371/journal.pone.0247792), 2021-02-26
Supplement: pone.0247792.s010.pdf [file pone.0247792.s010.pdf]

| <b>CT values (RNA, RT-qPCR)</b> | <b>Diagnostic (RNA, LAMP)</b> | <b>Diagnostic (PK+HID, LAMP)</b> |
|---------------------------------|-------------------------------|----------------------------------|
| N: 25<br>ORF1ab: 24             | positive                      | positive                         |
| N: 20<br>ORF1ab: 20             | positive                      | positive                         |
| N: 28<br>ORF1ab: 27             | positive                      | positive                         |
| N: 27<br>ORF1ab: 27             | positive                      | positive                         |
| N: 32<br>ORF1ab: 33             | positive                      | positive                         |
| N: 19<br>ORF1ab: 19             | positive                      | positive                         |
| N: 32<br>ORF1ab: 31             | positive                      | positive                         |
| N: 34<br>ORF1ab: 35             | negative                      | negative                         |
| N: 22<br>ORF1ab: 22             | negative                      | positive                         |
| N: 16<br>ORF1ab: 17             | positive                      | positive                         |
| N: 25<br>ORF1ab: 26             | negative                      | negative                         |
| N: 25<br>ORF1ab: 25             | negative                      | positive                         |
| N: 27<br>ORF1ab: 28             | negative                      | negative                         |
| N: 15<br>ORF1ab: 15             | positive                      | positive                         |
| N: 28<br>ORF1ab: 29             | negative                      | negative                         |
| N: 22<br>ORF1ab: 24             | negative                      | negative                         |

|                     |          |          |
|---------------------|----------|----------|
| N: 19<br>ORF1ab: 20 | positive | positive |
| N: 17<br>ORF1ab: 19 | positive | positive |
| N: 26<br>ORF1ab: 27 | negative | negative |
| N: 22<br>ORF1ab: 23 | positive | negative |
| N: 16<br>ORF1ab: 18 | positive | positive |
| N: 18<br>ORF1ab: 19 | positive | positive |
| N: 21<br>ORF1ab: 21 | positive | positive |
| N: 23<br>ORF1ab: 24 | negative | negative |
| N: 23<br>ORF1ab: 25 | positive | negative |
| N: 20<br>ORF1ab: 20 | positive | positive |
| N: 18<br>ORF1ab: 19 | positive | positive |
| N: 17<br>ORF1ab: 18 | positive | positive |
| N: 34<br>ORF1ab: 35 | negative | negative |
| N: 15<br>ORF1ab: 16 | positive | positive |
| N: 34<br>ORF1ab: 35 | negative | negative |
| N: 20<br>ORF1ab: 21 | positive | positive |
| N: 15<br>ORF1ab: 16 | positive | positive |
| N: 16<br>ORF1ab: 17 | positive | positive |
| N: 19<br>ORF1ab: 20 | positive | positive |

|                     |          |          |
|---------------------|----------|----------|
| N: 19<br>ORF1ab: 20 | positive | positive |
| N: 30<br>ORF1ab: 31 | negative | negative |
| N: 35<br>ORF1ab: 37 | negative | negative |
| N: 32<br>ORF1ab: 33 | negative | negative |
| N: 23<br>ORF1ab: 25 | negative | negative |
| N: 35<br>ORF1ab: 36 | negative | negative |
| N: 27<br>ORF1ab: 28 | negative | negative |

**S4 Table.** CT values of the positive samples processed by RNA extraction and analyzed by RT-qPCR targeting N and ORF1ab viral genes, and diagnostic results obtained with the same samples processed by RNA extraction or PK+HID and analyzed using a LAMP detection kit.
